# Supplementary material
Source: PubMed Central journal article supplement (PMC2475703)

# Figure S1

## A

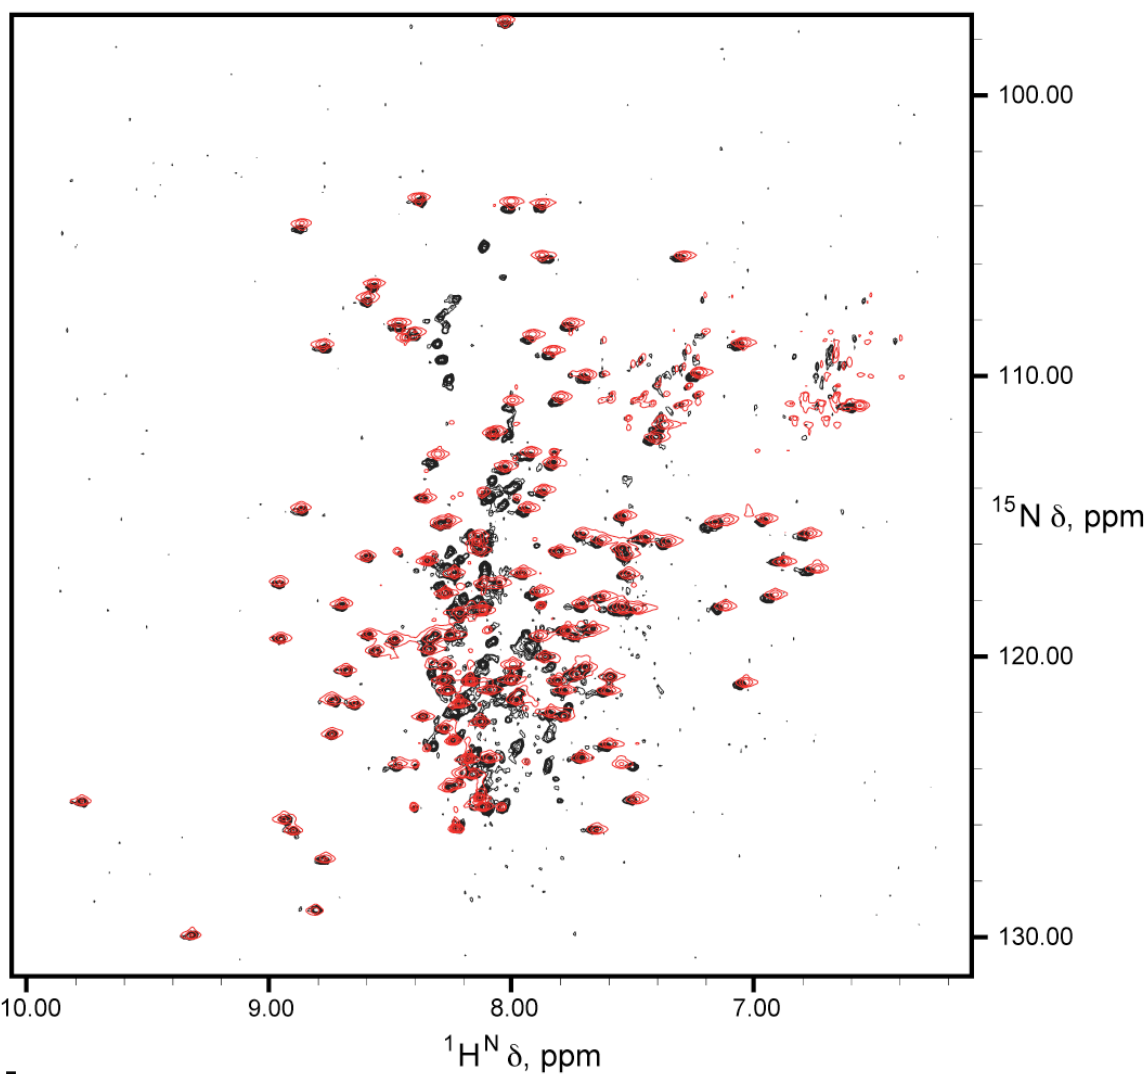

## B

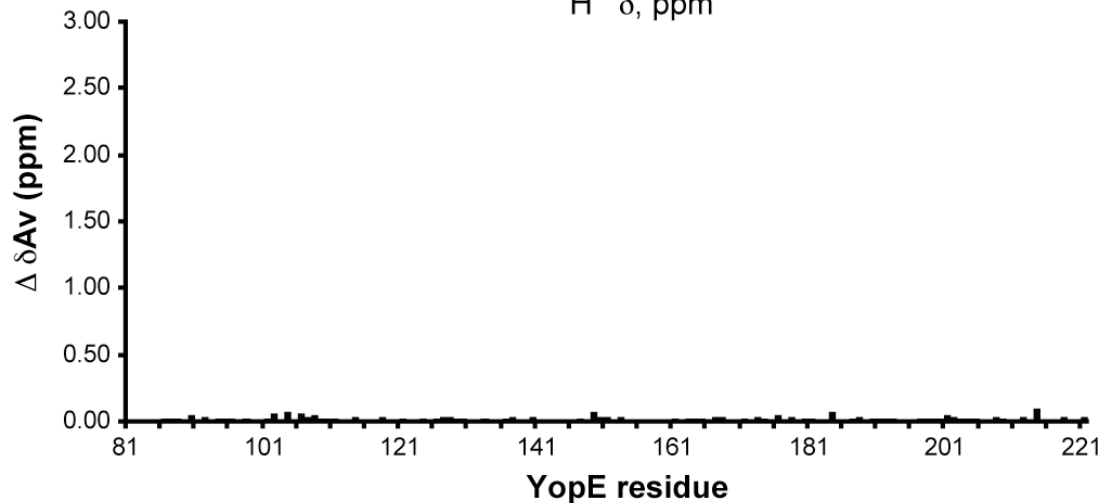

Figure S1. Structural integrity of renatured YopE and SycE-YopE. (A)  $^{15}\text{N}$ ,  $^1\text{H}$ -TROSY NMR spectra of renatured  $^{15}\text{N}$ -labeled YopE (black) and  $^{15}\text{N}$ -labeled YopE(RhoGAP) (residues 81-219) (red). (B) Differences in  $^1\text{H}$  and  $^{15}\text{N}$  chemical shifts ( $\Delta \delta_{\text{Av}}$ ) between YopE and YopE(RhoGAP). (C)  $^{15}\text{N}$ ,  $^1\text{H}$ -TROSY NMR spectra of renatured SycE- $^{15}\text{N}$ -labeled YopE (black) and  $^{15}\text{N}$ -labeled YopE(RhoGAP) (red). (D) Differences in  $^1\text{H}$  and  $^{15}\text{N}$  chemical shifts ( $\Delta \delta_{\text{Av}}$ ) between SycE-YopE and YopE(RhoGAP).

Figure S1, continued

C

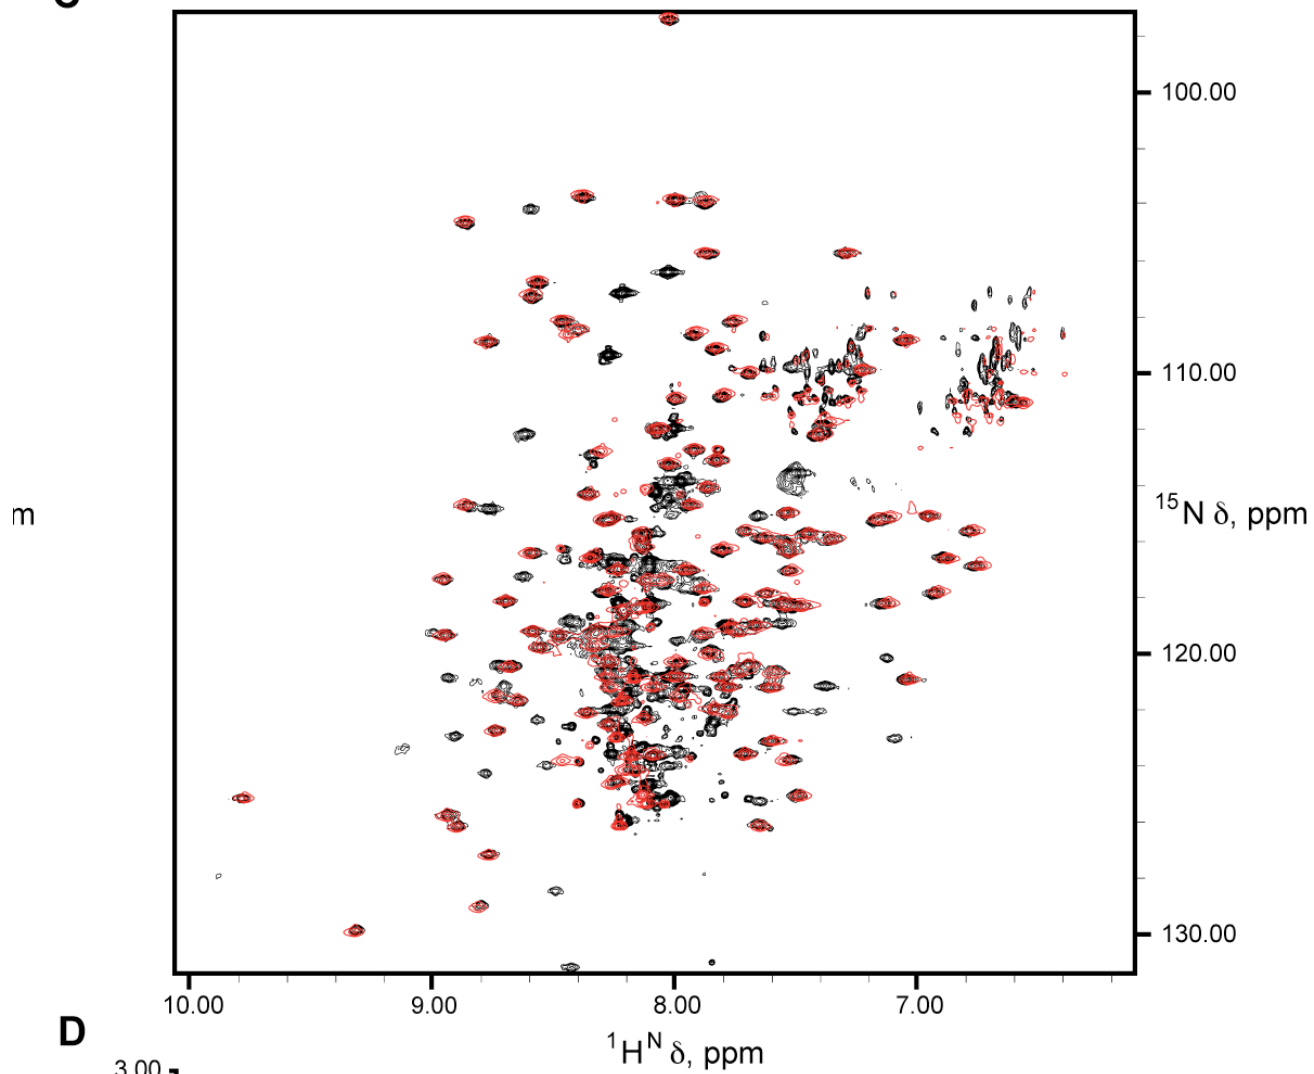

D

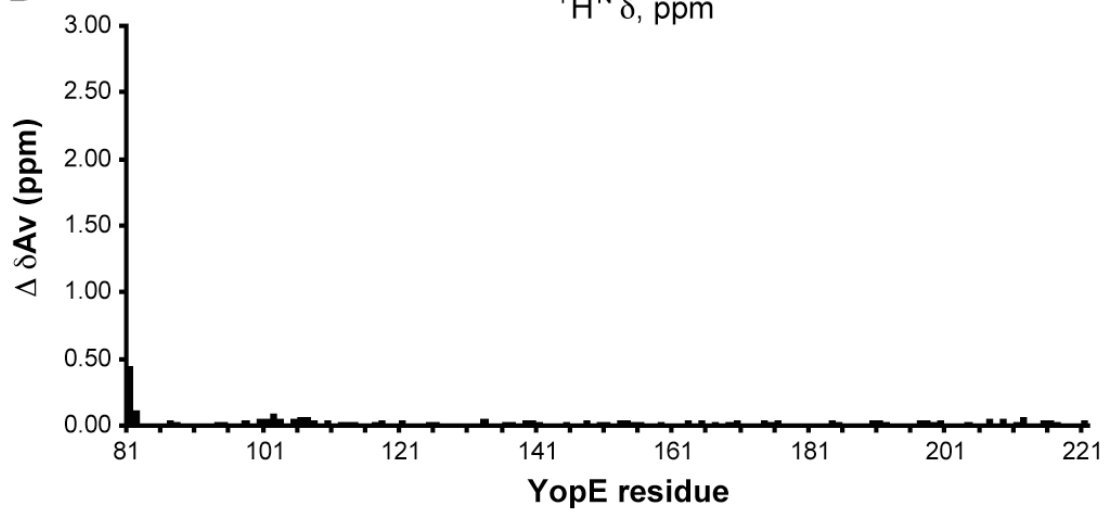

Supplement: supp_M802339200_Rodgers_FigS1.pdf [file supp_M802339200_Rodgers_FigS1.pdf]
